# Supplementary material
Source: PubMed Central journal article supplement (PMC7597596)

# LAL Endotoxin Assay

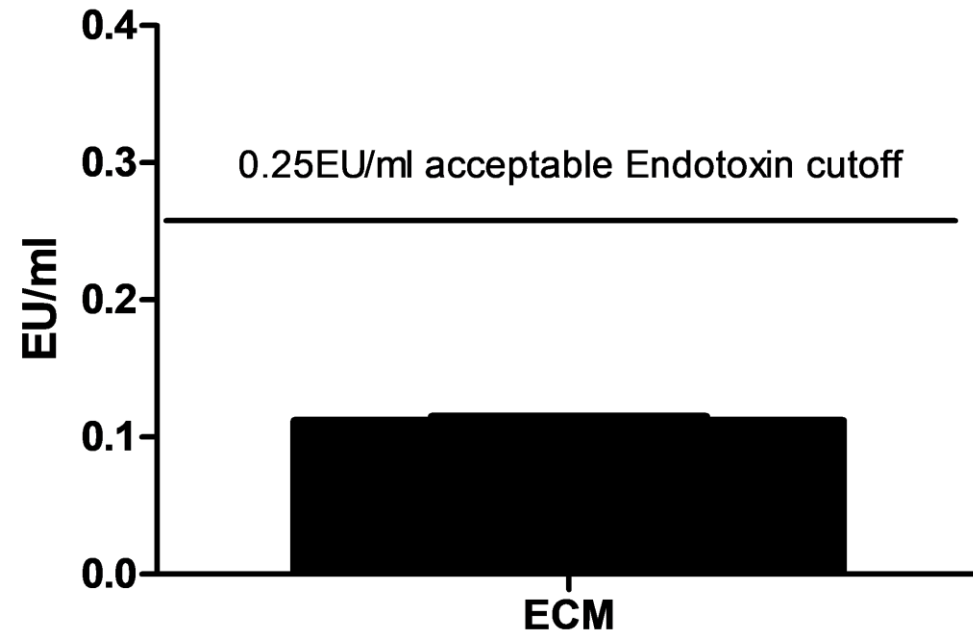

Supplement: CEI-202-226-s001.pdf [file CEI-202-226-s001.pdf]

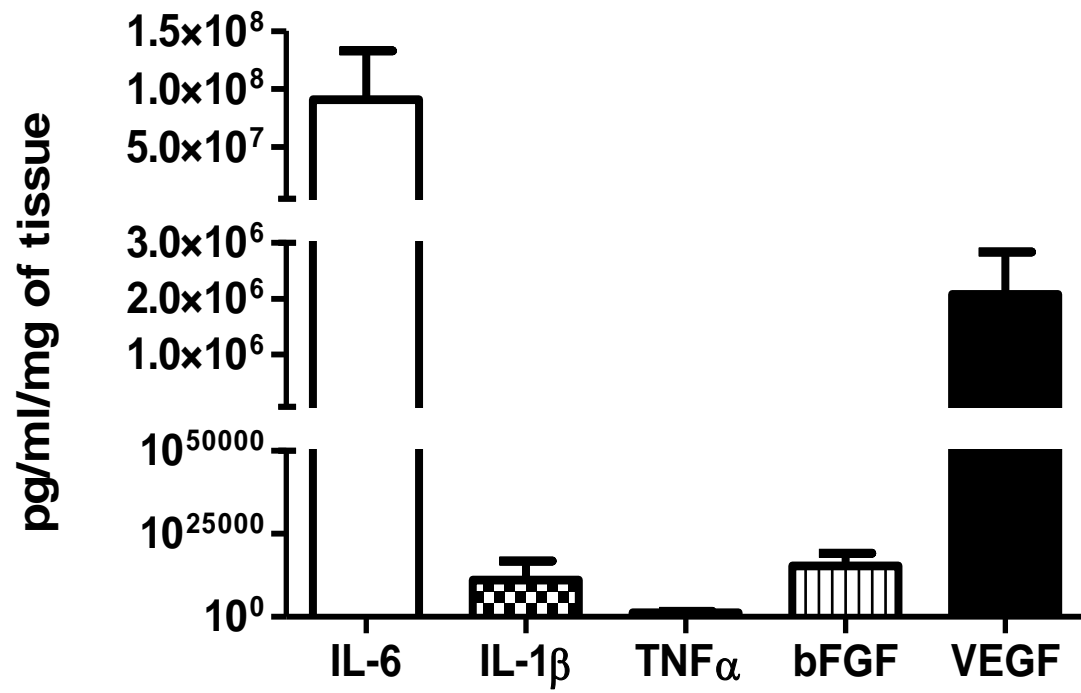

Supplement: CEI-202-226-s002.pdf [file CEI-202-226-s002.pdf]

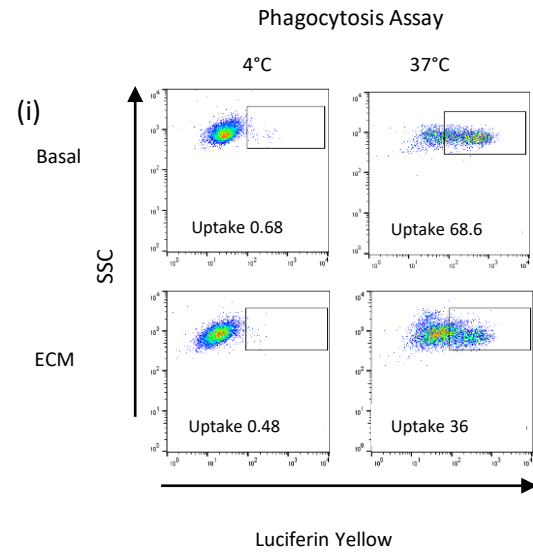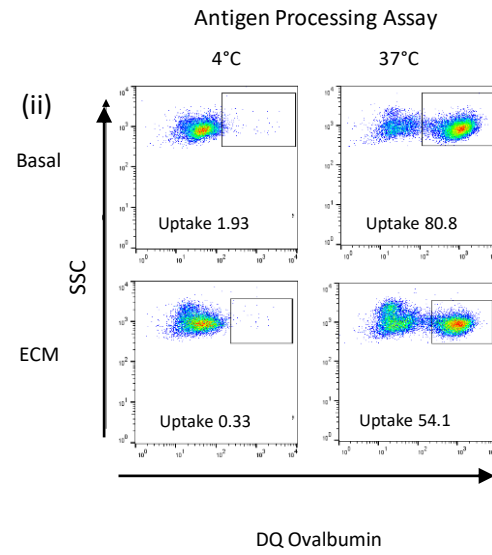

Supplement: CEI-202-226-s003.pdf [file CEI-202-226-s003.pdf]

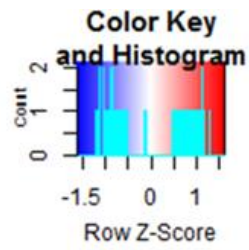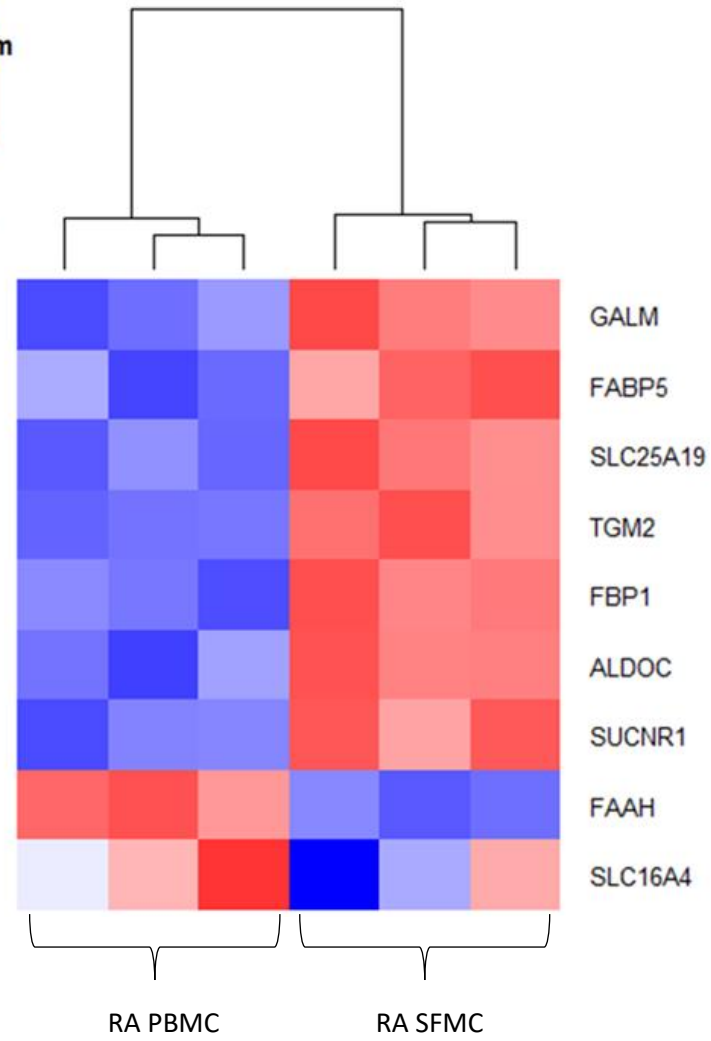

Supplement: CEI-202-226-s004.pdf [file CEI-202-226-s004.pdf]
